# Supplementary material for: CU splitting early termination based on weighted SVM
Source: Springer Nature journal article supplement (doi:10.1186/1687-5281-2013-4), 2013-01-09

CU 64x64 Quad-tree

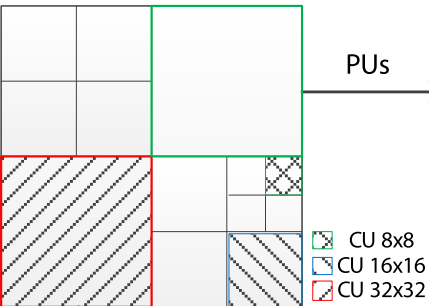

PUs

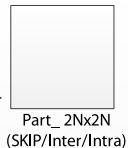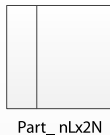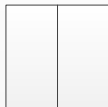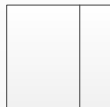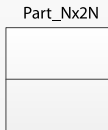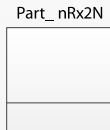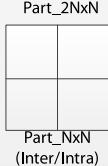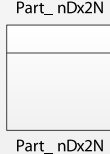

TU 32x32 Quad-tree

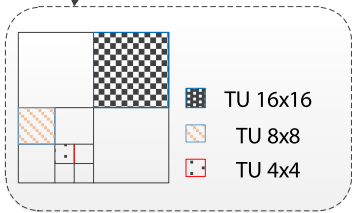

Supplement: 13640_2012_46_MOESM1_ESM.pdf [file 13640_2012_46_MOESM1_ESM.pdf]
